# Supplementary material for: Rapid PCR-Based Nanopore Adaptive Sequencing Improves Sensitivity and Timeliness of Viral Clinical Detection and Genome Surveillance
Source: Front Microbiol. 2022 Jun 16;13:929241. doi: 10.3389/fmicb.2022.929241 (PMC9244360; doi:10.3389/fmicb.2022.929241)
Supplement: Supplementary file 3 [file Table_1.XLSX]

## Sheet: Table S1
Table S1. Sequencing overall performance of 4 HAdV nanopore adaptive sequencing runs
Sequencing run	Group	Number of total reads	Number of total bases	Median read length	Median read quality
single sample LNAS workflow	Control	274384	291107160	596	11.2349
	Enriched	215249	90008997	417	11.132
	Total	489633	381116157	457	11.1891
single sample RPNAS workflow	Control	484601	1739057209	3609	10.3757
	Enriched	607775	210621249	307	9.58915
	Total	1092376	1949678458	423	9.86835
9 pooled sample LNAS workflow	Control	1458701	638880197	346	9.36717
	Enriched	2120159	698130900	319	9.46579
	Total	3578860	1337011097	327	9.42627
9 pooled sample RPNAS workflow	Control	936108	3237882277	3415	11.7638
	Enriched	1759667	690815001	371	10.4911
	Total	2695775	3928697278	427	10.8337

## Sheet: Table S2
Table S2. Statistical analysis of the data yield and enrichment fold of 20 HAdV samples
Sequencing run	Sample	Group	Number of total reads	Number of total bases	Number of HAdV reads	Number of HAdV bases	Enrichment fold based on HAdV base yield	Enrichment fold based on HAdV base abundance
single sample LNAS workflow	M9	enriched	215249	90008997	142	190062	0.833671	2.69626
		control	274384	291107160	156	227982
single sample RPNAS workflow	HB204	enriched	607775	210621249	4397	17190698	1.26942	10.4814
		control	484601	1739057209	3411	13542149
9 pooled sample LNAS workflow	HB206	enriched	232990	76298015	1	1294	3.5163	3.32147
		control	163299	72070476	1	368
	HB205	enriched	152749	49636370	1	495	N/A	N/A
		control	106763	42137487	0	0
	HB207	enriched	436184	141597298	6	5813	2.25223	1.86698
		control	308537	117376997	2	2581
	HB109	enriched	87869	29091178	1	399	0.240651	0.223777
		control	60704	27051272	3	1658
	HB201	enriched	306112	100573324	9	10206	7.08258	5.92357
		control	211841	84115289	4	1441
	HB111	enriched	54655	18904120	4	2616	0.416693	0.488184
		control	37374	22147450	4	6278
	HB203	enriched	270546	87208296	13	11550	3.23529	2.66761
		control	189351	71906090	8	3570
	HB107	enriched	182652	63526847	89	47302	0.902796	1.2034
		control	125851	84679712	87	52395
	HB208	enriched	125062	40775487	59	65817	1.37695	1.16253
		control	85840	34425846	43	47799
9 pooled sample RPNAS workflow	HB206	enriched	212639	77380076	44	150802	1.53654	7.86512
		control	122068	396087371	26	98144
	HB205	enriched	12159	4397084	0	0	N/A	N/A
		control	7292	29174623	1	3916
	HB207	enriched	249857	91678860	80	285926	1.83769	9.34318
		control	140025	466113981	45	155590
	HB109	enriched	276820	101022694	67	214703	1.621	7.89619
		control	159085	492100382	40	132451
	HB201	enriched	25044	9457854	127	494351	1.71533	9.6047
		control	14668	52957700	77	288196
	HB111	enriched	186746	69175686	257	1102655	1.503	9.06487
		control	104600	417212521	166	733638
	HB203	enriched	228859	85388237	628	2113012	1.75655	8.59844
		control	129854	417981076	350	1202931
	HB107	enriched	172980	64793611	239	1039826	2.14632	12.8552
		control	92556	388075335	110	484469
	HB208	enriched	187181	86317631	5286	19981229	1.90385	8.2031
		control	105823	371915949	2746	10495172

## Sheet: Table S3
Table S3. RT-PCR assay Ct value and adaptive sequencing data yield of SARS-CoV-2 samples
Sample	Ct value of SARS-CoV-2 ORF1ab gene	Ct value of human RNaseP gene	Group	Number of total reads	Number of total bases	Number of SARS-CoV-2 reads	Number of SARS-CoV-2 bases	SARS-CoV-2 genome mean depth	SARS-CoV-2 genome coverage (%)	Time for detecting the first SARS-CoV-2 read	Enrichment fold based on SARS-CoV-2 base yield	Enrichment fold based on SARS-CoV-2 base abundance
S38	17.909	26.773	enriched	559682	331160977	25442	64774982	2166.17	99.9298	1 min	2.06562	4.17117
			control	285832	668725217	12227	31358678	1048.68	99.8562	1 min
S44	24.546	29.321	enriched	315197	155280228	29	74427	2.48895	78.7714	6 min	1.52262	4.93314
			control	158369	503093890	20	48881	1.63465	57.633	29 min
S35	23.923	28.542	enriched	736412	360657892	78	151141	5.05438	86.2756	18 min	2.03562	4.02069
			control	371231	712359183	39	74248	2.48296	48.4366	5 min
S27	22.425	29.972	enriched	423414	209094694	462	1114491	37.2702	99.7759	3 min	2.16317	6.1222
			control	212206	591778041	221	515211	17.2294	99.2777	5 min
S42	23.888	28.676	enriched	254992	125549907	239	692473	23.1573	98.8362	6 min	2.29519	7.86003
			control	132762	429953454	104	301706	10.0895	95.3249	13 min
S45	27.888	29.841	enriched	520896	272561706	2	5554	0.185734	9.63114	7 h 51 min	N/A	N/A
			control	212204	682166401	0	0	0	0	N/A
S46	27.742	27.893	enriched	403351	215236844	1	1922	0.0642745	6.42745	28 min	N/A	N/A
			control	165918	657628853	0	0	0	0	N/A
S41	25.554	30.05	enriched	570207	301311131	3	9989	0.334047	22.0379	2 h 38 min	0.885314	2.39209
			control	236227	814132363	4	11283	0.37732	29.0807	9 h 22 min
S30	28.775	32.082	enriched	405141	214291058	7	16522	0.55252	38.0363	26 min	2.28742	6.75279
			control	178092	632618898	3	7223	0.241548	19.1218	4 h 13 min
S43	24.404	27.063	enriched	340154	180872627	13	36591	1.22366	55.9777	3 min	2.90036	9.34664
			control	137590	582875224	5	12616	0.421897	30.201	2 h 37 min
